1 **Exposure to landscape fire smoke extremely reduced birthweight in low- and middle-**  
2 **income countries**

3 Jiajianghui Li<sup>1,#</sup>, M.S.; Tianjia Guan<sup>2,#</sup>, Ph.D; Qian Guo<sup>3,#</sup>, M.S.; Guannan Geng<sup>4</sup>, Ph.D;  
4 Huiyu Wang<sup>1</sup>, M.S.; Fuyu Guo<sup>1</sup>, Ph.D; Jiwei Li<sup>5</sup>, Ph.D; Tao Xue<sup>1,\*</sup>, Ph.D

- 5 1. Institute of Reproductive and Child Health / Ministry of Health Key Laboratory of  
6 Reproductive Health and Department of Epidemiology and Biostatistics, School of Public  
7 Health, Peking University Health Science Centre, Beijing, China, 100191  
8 2. Department of Health Policy, School of Health Policy and Management, Chinese Academy of  
9 Medical Sciences and Peking Union Medical College, Beijing, China, 100730  
10 3. School of Energy and Environmental Engineering, University of Science and Technology  
11 Beijing, Beijing 100083, China  
12 4. School of Environment, Tsinghua University, Beijing, China, 100085  
13 5. College of Computer Science and Technology, Zhejiang University, Hangzhou, China

14  
15 \* Corresponding to Tao Xue (txue@hsc.pku.edu.cn);  
16 # Those authors equally contribute to the paper.

17 This work was supported by PKU-Baidu Fund, National Natural Science Foundation of China,  
18 Peking University Health Science Centre (early career funding for Tao Xue), and CAMS  
19 Innovation Fund for Medical Sciences.

20  
21 Jiajianghui Li: lijiajianghuizi@stu.pku.edu.cn

22 Tianjia Guan: guan\_tianjia@163.com

23 Qian Guo: guo\_guo0825@163.com

24 Huiyu Wang: 193234751@qq.com

25 Fuyu Guo: fyguo@pku.edu.cn

26 Jiwei Li: jiwei\_li@zju.edu.cn

27 Guannan Geng: guannangeng@tsinghua.edu.cn

28 Tao Xue: txue@hsc.pku.edu.cn

29

30 **Abstract**

31 Landscape fire smoke (LFS) has been associated with reduced birthweight, but evidence from  
32 low- and middle-income countries (LMICs) is rare. Here, we present a sibling-matched case–  
33 control study of 227,948 newborns to identify an association between fire-sourced fine  
34 particulate matter (PM<sub>2.5</sub>) and birthweight in 54 LMICs from 2000 to 2014.

35 We selected mothers from the geocoded Demographic and Health Survey with at least two  
36 children and valid birthweight records. Newborns affiliated with the same mother were  
37 defined as a family group. Gestational exposure to LFS was assessed in each newborn using  
38 the concentration of fire-sourced PM<sub>2.5</sub>. We determined the associations of the within-group  
39 variations in LFS exposure with birthweight differences between matched siblings using a  
40 fixed-effects regression model. Additionally, we analyzed the binary outcomes of low  
41 birthweight (LBW) or very low birthweight (VLBW).

42 According to fully adjusted models, a 1 µg/m<sup>3</sup> increase in the concentration of fire-sourced  
43 PM<sub>2.5</sub> was significantly associated with a 2.17 g (95% confidence interval [CI]: 0.56–3.77)  
44 reduction in birthweight, a 2.80% (95% CI: 0.97–4.66) increase in LBW risk, and an 11.68%  
45 (95% CI: 3.59–20.40) increase in VLBW risk.

46 Our findings indicate that gestational exposure to LFS harms maternal health.

47

## 48 **Introduction**

49 The natural cycle of landscape fires (e.g., wildfires, tropical deforestation fires, and  
50 agricultural biomass burning) plays an important role in maintaining the terrestrial ecosystem.  
51 Yet, landscape fire smoke (LFS) triggers a costly and growing global public health problem<sup>1</sup>.  
52 The frequency and intensity of landscape fire events have tended to increase<sup>2,3</sup>, driven by  
53 interactions between human activities (e.g., slash and slave agriculture) and climate change<sup>4</sup>.  
54 Most emissions originate from fires located in tropical rainforests and savannas, where they  
55 cause recurrent episodes of severe ambient pollution that affect mainly low- and middle-  
56 income countries (LMICs)<sup>1</sup>. Worldwide concern regarding large-scale natural forest burning  
57 has sparked increasing interest in the harmful effects of LFS exposure on human health.

58 LFS is composed of hundreds of combustion products, such as carbon monoxide, nitrogen  
59 oxides, and polycyclic aromatic hydrocarbons<sup>5</sup>. Particulate matter with an aerodynamic  
60 diameter  $\leq 2.5 \mu\text{m}$  (PM<sub>2.5</sub>) is one of the most widely studied pollutants derived from LFS. The  
61 24-h average PM<sub>2.5</sub> concentrations on burning days can be many times higher than those on  
62 normal days, and the peak level of ambient exposure can persist for several weeks<sup>6</sup>. Several  
63 epidemiological studies have shown adverse effects of LFS exposure on human health. The  
64 majority of the study outcomes involved morbidity and mortality caused by acute respiratory  
65 and cardiovascular diseases, particularly among vulnerable individuals, such as children and  
66 the elderly<sup>7-9</sup>. However, the health impacts of LFS on susceptible pregnant women, another  
67 highly vulnerable group due to gestation-related physiological changes, such as an increased  
68 breathing rate during pregnancy<sup>10</sup>, are rarely discussed. Previous studies have shown that  
69 gestational exposure to air pollutants, including those derived from LFS and other emissions,  
70 are associated with abnormal placental vascular function and, consequently, low birthweight  
71 (LBW)<sup>11</sup>, preterm birth<sup>12</sup>, and small for gestational age<sup>13</sup>. Exposure to air pollution  
72 induces subclinical disorders, such as inflammation, oxidative stress, increased blood  
73 viscosity, mitochondrial methylation, and hypoxia<sup>14,15</sup>, which renders the association between  
74 LFS and adverse maternal outcomes biologically plausible.

75 Birth weight comprehensively reflects the intrauterine environment quality, fetal growth, and  
76 maternal nutritional status. Therefore, LBW is a global public health problem. LBW  
77 neonates are at higher risk for a range of diseases in later life (e.g., early growth retardation  
78 and adulthood cardiorespiratory diseases) compared with normal newborns<sup>16,17</sup>. The estimated  
79 worldwide prevalence of LBW was 14.6% (95% confidence interval [CI] 12.4–17.1) in 2015,  
80 compared with 17.5% (95% CI 14.1–21.3) in 2000<sup>18</sup>. Although some progress has been made  
81 in reducing LBW globally, the average annual reduction rate is insufficient to achieve the  
82 2025 WHO global target<sup>19</sup>. Additionally, the relevant burden of LBW is unequally distributed  
83 in the world, as 91% of LBW infants are from LMICs, particularly from southern Asia and  
84 sub-Saharan Africa<sup>18</sup>.

85 All risk factors for adverse birth defects should be screened thoroughly to protect maternal  
86 and infant health. In addition to conventional factors, such as nutrition and maternal condition,  
87 environmental factors, including ambient PM<sub>2.5</sub> exposure, also contribute to a considerable  
88 global burden of adverse birth outcomes<sup>20</sup>. Although a growing number of studies have  
89 suggested the deleterious effects of urban air pollution on LBW<sup>21,22</sup>, little is known about fire-  
90 sourced PM<sub>2.5</sub>. Furthermore, studies concerning the association between LFS and birthweight  
91 have focused primarily on high-income countries, and their conclusions have been  
92 inconsistent<sup>23-26</sup>. As most landscape fires occur in LMICs (Figure 1), studies to assess the  
93 relevant health impacts of LFS among residents of such countries are warranted. Hence, we  
94 explored the association between birthweight and fire-sourced PM<sub>2.5</sub> in 54 LMICs using a  
95 sibling-matched case–control study from 2000 to 2014, which was based on a series of global  
96 surveys.

## 97 **Methods**

### 98 *Study population*

99 The birthweight data and relevant individual variables were extracted from 113 individual  
100 Demographic and Health Surveys (DHSs) representing 54 LMICs from 2000 to 2014 (Figure  
101 1). The DHSs were conducted by the US Agency for International Development to

102 characterize the demography and health of more than 90 developing countries. DHSs are  
103 usually conducted every 5 years in each country, using a two-stage sampling design.  
104 Information on demographic factors, socioeconomic factors, and health status was collected  
105 from a nationally representative probability sample of households. Well-trained fieldworkers  
106 conducted the surveys using uniformly designed questionnaires in the native language. The  
107 primary sampling units (e.g., villages or blocks) have begun to be geocoded in recent waves  
108 using global positioning systems (GPSs). The GPS-enhanced DHSs were matched with  
109 environmental exposure and thus included in our analyses. Please refer to the open-access  
110 website for detailed information on the DHS database: <https://www.dhsprogram.com/>.

111 All females aged 15–49 years within each selected household were eligible respondents of the  
112 survey. The health outcome analyzed in this study was birthweight. The DHSs asked the  
113 screened mothers to recall the birthweight of all children born during the 5 years leading up to  
114 the survey date. To characterize different levels of reduced birthweight, we examined two  
115 binary outcomes: LBW (birthweight < 2,500 g) and very LBW (VLBW, birthweight < 1,500  
116 g). Other covariates, such as maternal age and birth time (in months), were extracted from the  
117 relevant questionnaires.

### 118 *Exposure assessment*

119 We assessed ambient exposure to LFS as the PM<sub>2.5</sub> concentration attributable to landscape  
120 fires (hereafter, defined as fire-sourced PM<sub>2.5</sub>), referring to a previous study<sup>27</sup>. The fire-  
121 sourced PM<sub>2.5</sub> concentrations were estimated using the GEOS-Chem chemical transport model  
122 (CTM). The detailed settings of the GEOS-Chem are provided in the supplemental text.

123 The fire-sourced PM<sub>2.5</sub> was derived from a comparison between two GEOS-Chem model runs.  
124 The two models were identical except for switching on and off fire emissions. We quantified  
125 the fraction ( $\rho_m$ ) of fire-attributed PM<sub>2.5</sub> using the following equation:

$$126 \quad \rho_{m,y} = (\text{PM}_{2.5,m,y}^{\text{on}} - \text{PM}_{2.5,m,y}^{\text{off}}) / \text{PM}_{2.5,m,y}^{\text{on}} \dots\dots (1),$$

127 where the superscripts *on* and *off* denote the two simulations switching on and off fire

128 emissions, respectively; and the subscripts  $m$  and  $y$  are month and year indicators,  
129 respectively.

130 Additionally, considering the potential errors in the CTM procedure<sup>28</sup>, the bias correction  
131 approach has been widely applied to improve CTM performance in exposure assessments  
132 using ground-surface observational data<sup>29</sup>. We utilized a well-developed and widely utilized  
133 product of satellite-based PM<sub>2.5</sub> estimates<sup>30</sup> (PM<sub>2.5,y</sub><sup>satellite</sup>) in the bias correction. This product  
134 has a spatial resolution of 0.05° × 0.05° and was publicly available from 1998 to 2018 as the  
135 gridded annual mean ([http://fizz.phys.dal.ca/~atmos/martin/?page\\_id=140#V4.GL.03](http://fizz.phys.dal.ca/~atmos/martin/?page_id=140#V4.GL.03)). We  
136 prepared the GEOS-Chem simulations ( $\rho_{m,y}$  and PM<sub>2.5,m,y</sub><sup>on</sup>) in the same 0.05° × 0.05° grid  
137 using an inversed distance-weighted downscaling approach before bias correction. The bias  
138 correction rate ( $\eta_y$ ) was calculated as

139 
$$\eta_y = \text{PM}_{2.5,y}^{\text{satellite}} \div (1/12 \times \sum_m \text{PM}_{2.5,m,y}^{\text{on}}) \dots\dots (2).$$

140 The monthly exposure indicator of fire-sourced or non-fire-sourced PM<sub>2.5</sub> was finally derived  
141 as

142 
$$[\text{Fire-sourced PM}_{2.5}]_{m,y} = \eta_y \times \rho_{m,y} \times \text{PM}_{2.5,m,y}^{\text{on}},$$

143 
$$[\text{Non-fire-sourced PM}_{2.5}]_{m,y} = \eta_y \times (1 - \rho_{m,y}) \times \text{PM}_{2.5,m,y}^{\text{on}} \dots\dots (3).$$

144 We utilized the non-fire-sourced PM<sub>2.5</sub> as a potential confounder in the subsequent  
145 epidemiological analysis. We also collected other environmental variables, including ambient  
146 temperature and humidity data, from an assimilated dataset called Modern-Era Retrospective  
147 analysis for Research and Applications, version 2 (please refer to the supplemental text for  
148 more details). The variables were downloaded as monthly gridded values and prepared in the  
149 0.05° × 0.05° grid in the same way as we processed the GEOS-Chem outputs.

150 To understand the associations between birthweight and environmental variables, we focused  
151 on exposure during gestation. As the DHSs did not record the specific duration of gestation,  
152 we utilized the 9-month average preceding the survey month as exposure time during

153 pregnancy.

154

### 155 ***Study design***

156 To evaluate the association between fire-sourced PM<sub>2.5</sub> and birthweight, we applied a sibling-  
157 matched case–control study, similar to our previous work<sup>31</sup>. We defined the descendants of  
158 the same mother as a family group of matched siblings and compared birthweights within  
159 each group. The family-level baseline birthweight (defined as the mean birthweight within  
160 each group) can be affected by many complex factors, including genetics, socioeconomic  
161 position, and quality of local medical services, which can be difficult to measure. We matched  
162 the mothers to control for those unmeasured confounders in the study design. A sibling-  
163 matched case–control design is a simple, robust, and cost-efficient method, particularly for  
164 large-population data with potential heterogeneity<sup>32,33</sup>.

165 We extracted the females with at as least two valid records of newborns from all available  
166 individual DHSs. Each valid record was defined using the following inclusion criteria: (1) a  
167 valid birthweight, (2) a record of the GPS coordinates, (3) a valid birthdate, and (4) valid  
168 environmental exposure values (some of the satellite-based PM<sub>2.5</sub> estimates were not available  
169 for some locations, such as small islands). Finally, our dataset assembled 113 individual  
170 surveys from 54 countries (Figure 1) and included 227,948 newborns classified into 109,137  
171 groups according to their mothers.

### 172 ***Statistical analyses***

173 According to the sibling-matched method, we used a fixed-effects regression model to  
174 evaluate the associations between fire-sourced PM<sub>2.5</sub> and LBW or VLBW. The model was  
175 specified as

$$176 \quad y_{i,j} \sim x_{i,j}\beta + z_{i,j}\gamma + \theta_i \dots \dots (4),$$

177 where the subscripts  $i$  and  $j$  denote the indices of the mother-affiliated group and child,

178 respectively;  $x_{i,j}$  denotes the concentration of fire-sourced  $PM_{2.5}$ ;  $z_{i,j}$  denotes the adjusted  
179 covariates;  $y_{i,j}$  denotes the outcome variable; and  $\theta_i$  is a nuisance parameter for the fixed-effect  
180 to control for group-specific unmeasured confounders. The model was specified as Gaussian  
181 regression when setting  $y_{i,j}$  as the birthweight and as logit regression when setting  $y_{i,j}$  as the  
182 logit-transformed probability of LBW or VLBW. The adjusted covariates included maternal  
183 age; child sex; multiple births; non-fire-sourced  $PM_{2.5}$ ; spline terms of birth order (with 5  
184 degrees of freedom [DF]), of temperature (3 DF), of humidity (3 DF), of the calendar year (5  
185 DF), and of the monthly index (4 DF); and a spatiotemporal effect parametrized by the  
186 interaction between country and calendar year. The nonlinear effects of month and year  
187 controlled for the seasonal periodic variation and long-term trend in child health, respectively.  
188 The spatiotemporal effect captured country-specific trends. The association between  
189 birthweight and LFS was evaluated by the regression coefficient  $\beta$  for  $1 \mu\text{g}/\text{m}^3$  increases in  
190 fire-sourced  $PM_{2.5}$ . The association with LBW or VLBW was evaluated by excess risk [=  $(1 -$   
191  $\exp(\beta)) \times 100\%$ ] for a  $1 \mu\text{g}/\text{m}^3$  increase in fire-sourced  $PM_{2.5}$ . All environmental exposures  
192 were quantified using the same time window. The major time window was the 9 months  
193 before birth. We also calculated the alternative exposure indicator as an average during the 3  
194 or 6 months preceding birth.

195 In sensitivity analyses, we first derived the lag-distributed model to explore how the  
196 association varied during the exposure time window. Next, subpopulation-specified  
197 associations were estimated using interaction analyses to detect potential heterogeneity. Third,  
198 we developed nonlinear associations by replacing the linear term of fire-sourced  $PM_{2.5}$  using a  
199 set of thin-plate spline functions. Fourth, to examine potential recall bias, we estimated the  
200 associations by strata of the durations from birth to survey time. Fifth, to test whether the  
201 estimated associations were attributable to LFS exposure or other direct damage related to  
202 landscape fires (e.g., destroying human habitats), we derived an indicator for the transported  
203 fire-sourced  $PM_{2.5}$ , according to a satellite image of the burned area (MCD64A1,  
204 <https://lpdaacsvc.cr.usgs.gov/appears/>). The fire-sourced  $PM_{2.5}$  at the pixels with the zero-  
205 burned area during gestation were defined as smoke transported from other locations. The



206 associations with transported fire-sourced PM<sub>2.5</sub> could be indicative of the effect of LFS  
207 exposure via the inhalation pathway.

208 Family-level baseline birthweight and the correlated gestation length can be determined by  
209 factors such as genetics and socioeconomic level, which may also affect the association  
210 between the within-group change in birthweight and LFS exposure. The fixed-effects  
211 regression models actually infer an association by examining the coherence between  
212 derivation of individual-level birthweight from the family-level mean (i.e., the expected  
213 birthweight given a specific family) and the corresponding exposure. To show that, we  
214 defined the family-level baseline birthweight as  $y_i$ . Equation (4) was equivalently transformed  
215 as  $\Delta y_{ij} = (y_{i,j} - y_i) \sim x_{i,j} \beta + z_{i,j} \gamma + (\theta_i - y_i)$ , where  $(\theta_i - y_i)$  is viewed as a new nuisance  
216 parameter  $\theta_i^*$ . The nature of fixed-effects model made it possible to explore how the effect of  
217 fire-sourced PM<sub>2.5</sub> varied according to family-level mean birthweight. Accordingly, we  
218 derived a baseline-varying association model as follows:

219 
$$\Delta y_{i,j} \sim f(y_i) x_{i,j} + z_{i,j} \gamma + \theta_i^* \dots \dots (5),$$

220 where  $f(y_i)$  denotes the baseline-varying coefficient and is parametrized by a set of spline  
221 functions.

222 All analyses were performed in R (version 4.0.2) (The R Foundation for Statistical  
223 Computing, Vienna, Austria). Inference for the fixed-effects models was performed using the  
224 *fixest* package. The lag-distributed effect was parametrized using the *dlnm* package, and the  
225 thin-plate splines for the nonlinear association and baseline-varying effect were parametrized  
226 using the *mgcv* package.

## 227 **Results**

### 228 ***Descriptive summary***

229 Among the 227,948 samples analyzed from 54 LMICs, there were 109,137 groups of siblings,  
230 who were matched to their mothers. Each group had an average of 2.13 (standard deviation

231 [SD]: 0.36) samples. Approximately half of the samples were from Sub-Saharan Africa and  
232 one-quarter from South Asia. The mean birthweight was 3,082 (SD: 724) g. There were  
233 31,854 LBW births and 2,912 VLBW births. More statistics on the analyzed samples are  
234 shown in Supplemental Table S1.

235 The spatial distribution of the long-term average fire-sourced  $PM_{2.5}$  concentrations is  
236 displayed in Figure 1. Our modeling results indicate that the hotspots of LFS include regions  
237 of the Congo rainforest basin, Amazon rainforest basin, Indonesian forests, Siberia forests,  
238 and other forest areas. Our analyzed samples included newborns from the first three regions.  
239 Among our samples, the average concentration of full gestational exposure to fire-sourced  
240  $PM_{2.5}$  was 4.29 (SD: 5.53)  $\mu g/m^3$ . A detailed summary of the environmental exposures is  
241 presented in Table S1.

242 Gestational exposure to fire-sourced  $PM_{2.5}$  varied widely between family groups; it was higher  
243 in those living closer to hotspot regions (e.g., forests). Approximately 92% of the variation in  
244 fire-sourced  $PM_{2.5}$  exposure was between family groups, and 8% was within family groups.  
245 For the total variation in birthweight, 71.7% was between groups and 28.3% within groups  
246 (Table 1). The within- or between-group variations reflected temporal or spatial changes in  
247 those variables, respectively. Birthweight and fire-sourced  $PM_{2.5}$  were negatively correlated in  
248 the temporal dimension but positively correlated in the spatial dimension. As the spatial  
249 patterns in birthweight and fire-sourced  $PM_{2.5}$  were determined by geographic, socioeconomic,  
250 and cultural factors, the between-group correlations may have been confounded by their  
251 common determiners, such as urbanization level. The complex correlations between  
252 birthweight and LFS suggest that statistical inference of their associations should be  
253 cautiously determined based on well-designed epidemiological analysis.

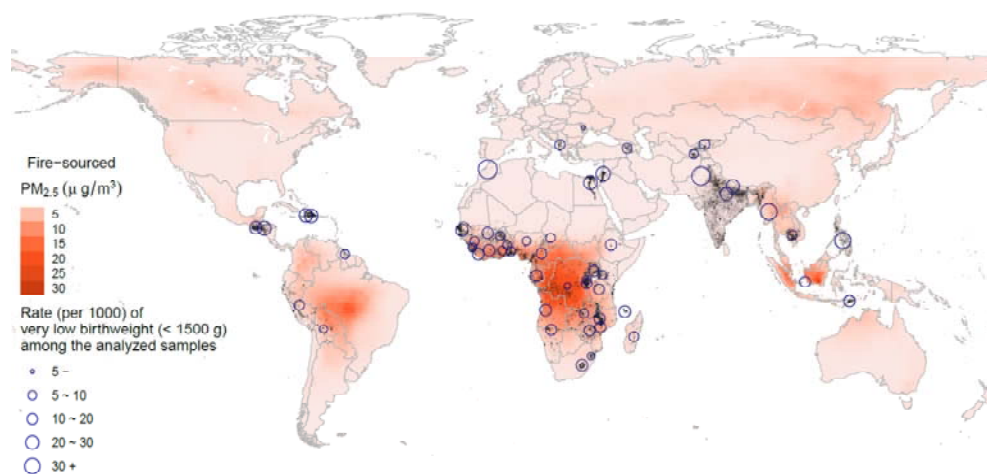

254

255 Figure 1 Distribution of the fire-sourced PM<sub>2.5</sub> concentrations (average for 2000–2014) and

256 the locations of the analyzed samples (grey dots). The circles represent the rate of very-low-

257 birthweight births among the analyzed samples by country.

258 Table 1 Between- or within-group variations in birthweight and gestational exposure to fire-  
259 sourced PM<sub>2.5</sub> and their correlations.

|                                    | Standard deviation (% of total variance) |                                | Correlation (R) |
|------------------------------------|------------------------------------------|--------------------------------|-----------------|
|                                    | Birthweight                              | Fire-sourced PM <sub>2.5</sub> |                 |
| Total                              | 724 (100%)                               | 5.53 (100%)                    | 0.1594          |
| Between groups of matched siblings | 613 (71.7%)                              | 5.30 (91.7%)                   | 0.1973          |
| Within groups of matched siblings  | 386 (28.3%)                              | 1.59 (8.3%)                    | -0.0035         |

260 ***Association between LFS and birthweight***

261 Although the fully adjusted model indicated that a 1 µg/m<sup>3</sup> increase in exposure to fire-  
262 sourced PM<sub>2.5</sub> during the 9 months before birth was significantly associated with a 2.17 g (95%  
263 CI: 0.56–3.77) birthweight reduction, the association was sensitive to differences in the  
264 adjusted covariates and exposure time window (Figure 2). For example, the unadjusted model  
265 reported the estimated effect as a birthweight reduction of 0.84 g (95% CI: -0.53 to 2.22).  
266 The lag-specific associations did not display a clear time-varying pattern (Figure S1), which  
267 suggests a linear increase in strength in the association with increased length of the exposure  
268 time window (Figures S2 & 2). The subpopulation-specific results suggest that the association  
269 was potentially heterogeneous (Figure S3). The association was stronger for female infants,  
270 newborns of nulliparous mothers, or newborns of unemployed mothers, compared with the  
271 corresponding references (i.e., male infants, newborns of multiparous mothers, or newborns  
272 of employed mothers, respectively). The nonlinear analysis confirmed the adverse effect of  
273 LFS on birthweight (Figure 3). The sublinear association suggests a saturated effect of a ~60 g  
274 birthweight reduction for exposure to extreme fires, which contributed to a PM<sub>2.5</sub>  
275 concentration > ~20 µg/m<sup>3</sup>.

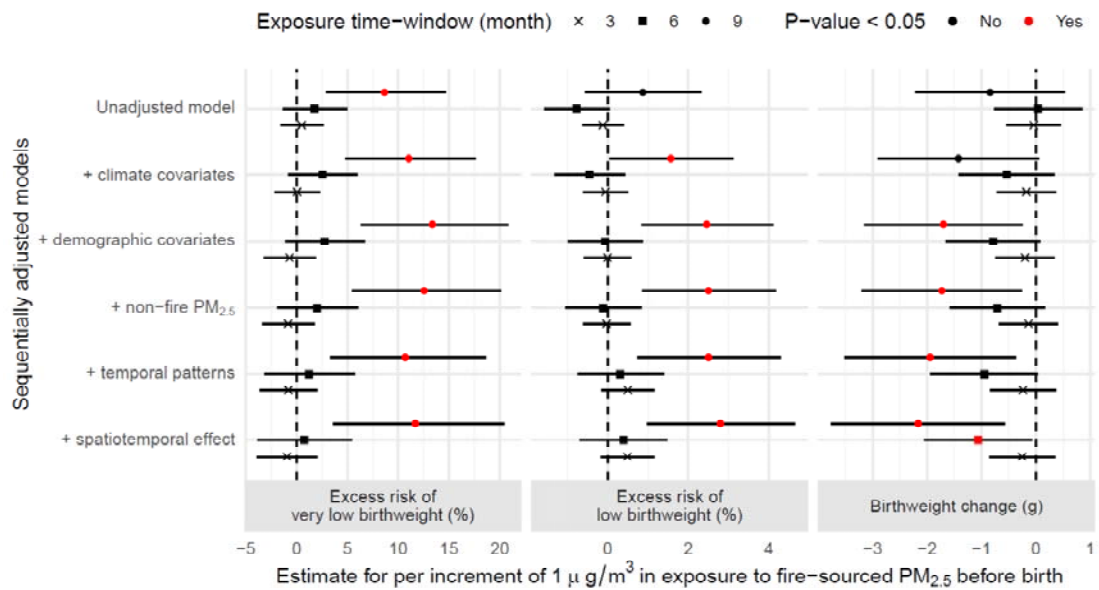

276

277 Figure 2 Estimated associations between gestational exposure to fire-sourced PM<sub>2.5</sub> and  
 278 birthweight change, low birthweight, or very low birthweight. The dots represent the point-  
 279 estimates, and bars represent the corresponding 95% confidence intervals.

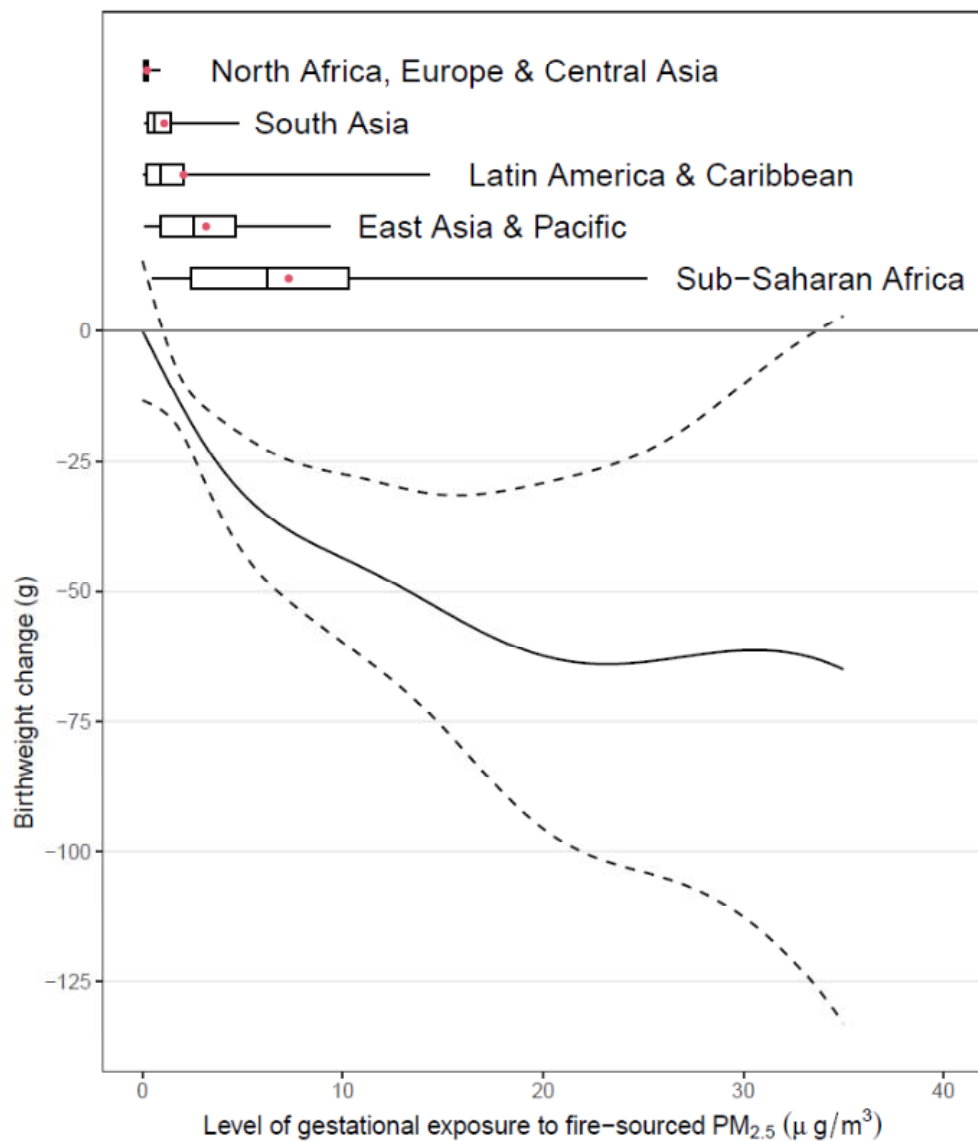

280

281 Figure 3 The nonlinear association between gestational exposure to fire-sourced PM<sub>2.5</sub> and  
282 change in birthweight. The solid line represents the point-estimates, the dashed line represents  
283 the 95% confidence intervals, the boxplots represent the distributions of different exposure  
284 levels by regions; and the red dots represent the mean exposure level.

285

286 *Association between LFS and VLBW*

287 Our fully adjusted models suggested that LFS exposure during the 9 months before birth was  
288 significantly associated with an increased risk of LBW or VLBW. According to the estimates,  
289 the risks of LBW and VLBW increased by 2.80% (95% CI: 0.97–4.66) and 11.68% (95% CI:  
290 3.59–20.40), respectively, for each 1  $\mu\text{g}/\text{m}^3$  increase in exposure to fire-sourced  $\text{PM}_{2.5}$ .  
291 Compared to LBW, VLBW was more strongly associated with fire-sourced  $\text{PM}_{2.5}$ . The  
292 estimated association for LBW was sensitive to different covariate adjustments (Figure 2) and  
293 was potentially heterogeneous among subpopulations (Figure S3). The association for VLBW  
294 was robust, given the adjustments for different covariates (Figure 2), and was less  
295 heterogeneous (Figure S3). Among all effect modifiers, only the type of cooking energy,  
296 which was indicated for indoor sources of particulate matter, significantly changed the  
297 association between VLBW and fire-sourced  $\text{PM}_{2.5}$  (P-value = 0.02, Figure S3). The use of  
298 unclear cooking energy, as a competing risk factor for fire-sourced  $\text{PM}_{2.5}$ , significantly  
299 weakened the association between VLBW and fire-sourced  $\text{PM}_{2.5}$ .

300 To further explore why VLBW was more strongly associated with fire-sourced  $\text{PM}_{2.5}$  than was  
301 LBW, we developed a model to estimate the baseline-varying association between birthweight  
302 and fire-sourced  $\text{PM}_{2.5}$ . As a result, the absolute change in birthweight for per unit exposure to  
303 fire-sourced  $\text{PM}_{2.5}$  varied with the baseline of family-level mean birthweight (Figure S4).  
304 Samples with an extremely low or high baseline birthweight were more susceptible to fire-  
305 sourced  $\text{PM}_{2.5}$  than were those with a moderate baseline birthweight, in terms of the absolute  
306 birthweight change (Figure S4). As a reduction in birthweight and a family-level baseline co-  
307 determined the increased incidence of LBW or VLBW, the relative change in birthweight  
308 reflected the relevant risk. Newborns from families with a lower baseline were more  
309 susceptible to fire-sourced  $\text{PM}_{2.5}$ , in terms of a relative birthweight reduction (Figure 4). This  
310 finding partially explains why gestational exposure to fire-sourced  $\text{PM}_{2.5}$  was robustly and  
311 strongly associated with VLBW. According to our estimates, a 1  $\mu\text{g}/\text{m}^3$  increase in fire-  
312 sourced  $\text{PM}_{2.5}$  was associated with a relative birthweight reduction of 1.47% (95% CI: 0.06–  
313 2.88), 0.54% (95% CI: 0.03–1.05), 0.16% (95% CI: 0.01–0.31), or 0.03% (95% CI: –0.04 to

314 0.10) for samples with a baseline birthweight of 1,500, 2,000, 2,500, or 3,000 g, respectively.

315 *Sensitivity analyses*

316 First, we explored potential recall bias using sensitivity analyses, and the estimated  
317 associations were not significantly different according to recall period (Figure S3). Second,  
318 we examined the spatial variations in the estimated associations. Although analysis of  
319 differences in region-specific associations reported non-significant results (Figure S3), we  
320 could not completely rule out the possibility of spatial heterogeneity in the estimated results.  
321 As most of our analyzed samples were from Sub-Saharan Africa, only those estimates were  
322 significant, and the remaining region-specific results had wide-ranging 95% CIs (Figure S3).  
323 Third, we explored whether the estimated adverse effects were attributable to ambient LFS  
324 exposure or other impacts (e.g., social stress) relevant to landscape fires. The estimated effects  
325 of exposure to fire-sourced PM<sub>2.5</sub> were not significantly different between locations without  
326 burning and those with burning (Figure S3). These results confirm that ambient exposure was  
327 the major exposure pathway for our analyzed outcomes.

328



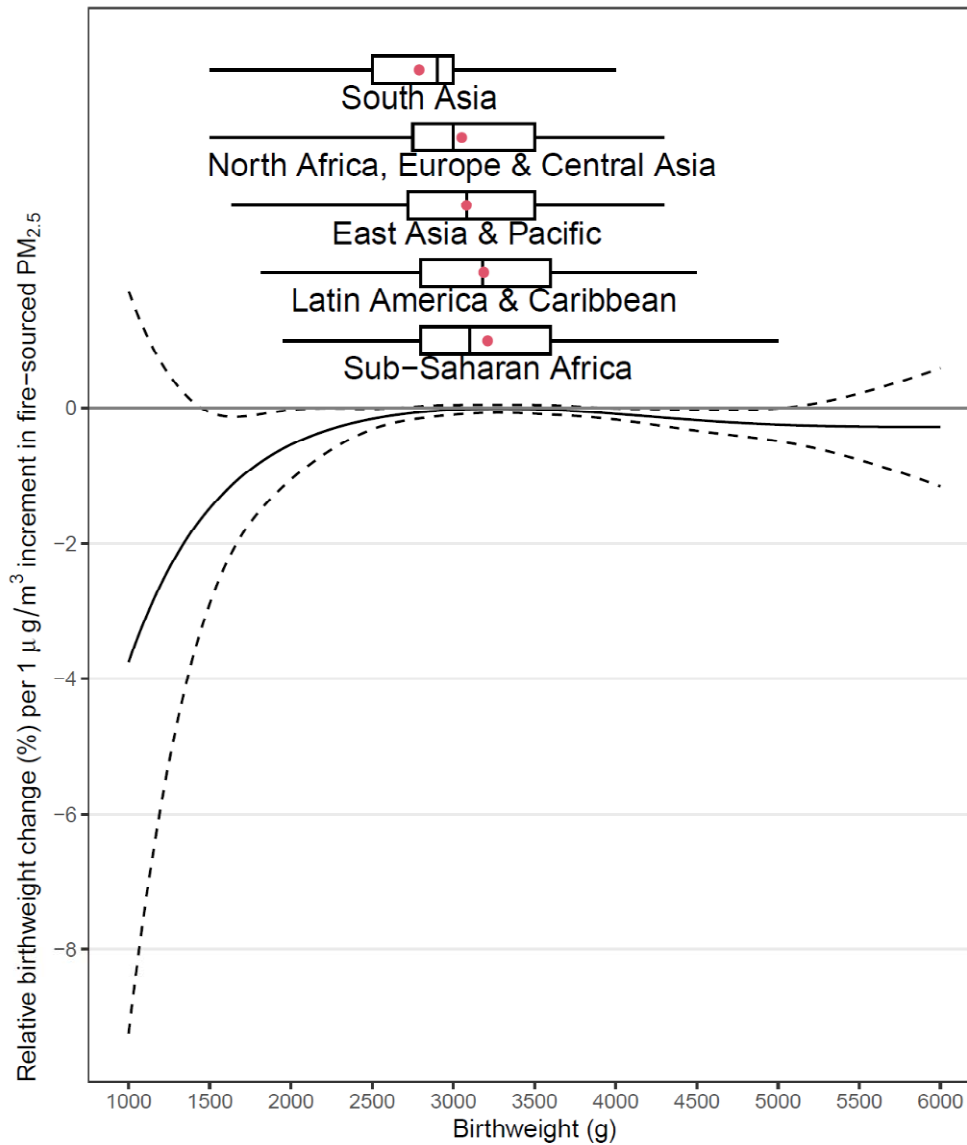

329

330 Figure 4 Baseline-varying association between gestational exposure to fire-sourced  $\text{PM}_{2.5}$  and  
331 relative change in birthweight. The solid line represents the point-estimates, the dashed line  
332 represents the 95% confidence intervals, and the boxplots represent the distributions of  
333 different birthweights by region.

334

## 335 Discussion

336 This study revealed an association between increased risk of VLBW and exposure to LFS  
337 during pregnancy in 54 LIMCs. We found that gestational exposure to fire-sourced PM<sub>2.5</sub>  
338 potentially reduced birthweight, and the infants with a low family-level mean of birthweight  
339 were susceptible to the effect of LFS. We present the first sibling-matched study on the  
340 association between birthweight and fire-sourced PM<sub>2.5</sub> from multiple LIMCs.

341 LFS contains numerous hazardous pollutants and exerts both short- and long-term effects on  
342 human health<sup>34</sup>. An adverse birth outcome is one of the consequences. Holstius et al.<sup>23</sup>  
343 estimated that the mean birthweight of fire-exposed infants are 7.0 g (95% CI: 11.8–2.2), 9.7  
344 g (95% CI: 14.5–4.8), and 3.3 g (95% CI: –0.6 to 7.2) lower than those of unexposed infants  
345 when wildfires occurred during the first, second, and third trimesters, respectively. In a  
346 retrospective cohort study in Brazil, fire-exposed mothers (defined as the highest PM<sub>2.5</sub>  
347 concentration quartile) reported a higher risk of LBW than did unexposed mothers. The  
348 adjusted odds ratios for exposure during the second and third trimesters were 1.51 (95% CI:  
349 1.04–2.17) and 1.50 (95% CI: 1.06–2.15), respectively<sup>24</sup>. Abdo et al.<sup>25</sup> showed that a 1  
350 µg/m<sup>3</sup> increase in the wildfire-sourced PM<sub>2.5</sub> concentration during the first trimester was  
351 associated with a 5.7 g (95% CI: 0.4–11.1) reduction in birthweight, in United States. In  
352 contrast, an Australian cross-sectional study reported that the average birthweight of male  
353 infants exposed to the 2003 Canberra wildfires was significantly higher than that of  
354 unexposed peers<sup>26</sup>. That study attributed the positive association between wildfire smoke and  
355 birthweight change to the potentially increased levels of maternal blood glucose after  
356 exposure.<sup>26</sup> The mixed results might be due to differences among studies in terms of  
357 epidemiological design, population characterization, exposure time window, and competing  
358 risk factors. Our results are comparable with most previous findings. Additionally, although  
359 there are few studies on fire-sourced PM<sub>2.5</sub> similar to ours, a large number of studies have  
360 focused on the effect of gestational exposure to urban ambient PM<sub>2.5</sub> on birthweight. A recent  
361 meta-analysis, which included more than 2.7 million participants, reported that the pooled risk  
362 ratio of LBW for a 10 µg/m<sup>3</sup> increase in PM<sub>2.5</sub> exposure was 1.081 (95% CI 1.043–1.120)<sup>21</sup>.

363 Considering the abundance of toxic organic particles derived from biomass burning, the  
364 association of birthweight with fire-sourced PM<sub>2.5</sub> should be stronger than that with urban  
365 PM<sub>2.5</sub>.

366 The family-level mean birthweight varied widely between households (Table 2). These  
367 variations may have been caused by many factors, including genetics, socioeconomic position  
368 (e.g., nutrition), and indoor household pollution. As birthweight is positively correlated with  
369 gestation length, a poor family-level baseline birthweight comprehensively indicates a  
370 combined risk of short gestation and LBW. Because the cumulative effect of fire-sourced  
371 PM<sub>2.5</sub> was observed to increase with exposure duration (Figure S2), a larger birthweight at the  
372 family level, as indicated for a longer gestation, increased the absolute effect of the per-unit  
373 LFS exposure (Figure S4).

374 As our models did not control for gestation length due to the lack of relevant data, the  
375 estimated associations reflected the joint outcome of LFS exposure by reducing gestation  
376 length or birthweight. The fetus grows in a sublinear temporal pattern<sup>35</sup> during the late  
377 gestational stage, which suggests its weight increases to an approximately stable level before  
378 birth. Considering this sublinear relationship and given the different baseline birthweights, the  
379 same reduction in gestation length led to different reductions in birthweight. The marginal  
380 effect of a shorter gestation period on the reduction in birthweight is larger for an infant with a  
381 lower baseline birthweight. For instance, if an infant is expected to reach the stable level of  
382 fetal weight, a marginal reduction in its gestational age will not considerably change the  
383 birthweight. As exposure to LFS has been reported to cause a short gestation<sup>25</sup>, its indirect  
384 effect on reduced birthweight can be enhanced by poor baseline maternal health.

385 Reducing the risk of LBW is one of the 2025 WHO global targets, and it contributes to  
386 achieving the Sustainable Development Goals. Although major interventions to reduce LBW  
387 have focused on improving maternal nutrition, environmental toxic pollutants, also identified  
388 as risk factors, can additionally contribute to the relevant disease burden. For instance,  
389 exposure to air pollution was linked to a global burden of 476,000 infant deaths in 2019

390 during the first month of life via increased risks of LBW and premature birth<sup>36</sup>. LFS induces  
391 peak concentrations of PM<sub>2.5</sub> lasting for a few weeks or months. Unlike other environmental  
392 exposures, such as urban PM<sub>2.5</sub>, LFS exposure is unequally distributed spatially and  
393 temporally. The individual-level impacts on exposed mothers are not negligible. Particularly,  
394 LFS exposure frequently occurred in LMICs (Figure 1), where the fire-sourced PM<sub>2.5</sub>  
395 adversely affected infants with other risk factors, such as malnutrition. However, due to the  
396 lower specificity of our model evaluating birthweight without adjusting for gestation length,  
397 we could not evaluate the clinical outcomes or disease burden of the LFS-attributed  
398 birthweight reductions. As there is an increasing probability of landscape fire under global  
399 climate change, assessing the adverse impacts of LFS exposure is of public health importance  
400 to protect maternal health in LMICs. Future studies should be conducted to answer this  
401 question.

402 This study was associated with the following limitations. First, the lack of data on specific  
403 gestation lengths in the DHSs limited our exploration. Without this information, we could not  
404 distinguish the exposure time window, which introduced potential exposure misclassifications  
405 into the epidemiological analyses. Also, we could not determine the clinical importance of the  
406 analyzed birthweight without normalizing it to gestation length. Second, characterizing LFS  
407 exposure is always challenging. Previous studies measured exposure using surrogates, such as  
408 the temporal duration of landscape fires or satellite remote sensing of fire points. To increase  
409 interpretability, we utilized fire-sourced PM<sub>2.5</sub> as a direct indicator of ambient exposure to  
410 LFS. However, as the exposure assessments were based on a CTM, the uncertainties  
411 introduced by the modeling procedure could not be avoided completely. The potential errors  
412 enhanced the exposure misclassifications in this study and thus may have resulted in a biased  
413 association. Third, since the analyzed samples were living newborns, our estimates were  
414 potentially subjected to survival bias. For instance, fire-sourced PM<sub>2.5</sub> was associated with  
415 extremely reduced birthweight, which increases the probability of stillbirth or neonatal death.  
416 In other words, our sample may have included fewer embryos more susceptible to fire-  
417 sourced PM<sub>2.5</sub> than expected. Therefore, survival bias could have led to an underestimated

418 association by ignoring those susceptible embryos. Finally, a sibling-matched study requires a  
419 selected sample, which may have lowered the representativeness of this study. The inclusion  
420 of infants of the DHS in this study was determined by many factors, such as family size and  
421 planning, willingness to bear a child, socioeconomic position, and contraceptive behavior.  
422 However, some of those factors could not be easily measured, which impeded the  
423 development of a set of sampling weights to increase the representativeness of our estimates.

#### 424 **Conclusions**

425 Using a global-scale sibling-matched case-control study, an association was identified  
426 between gestational exposure to fire-sourced PM<sub>2.5</sub> and reduced birthweight in LMICs. The  
427 association was sensitive to regression model settings and potential heterogeneity among  
428 different subpopulations. Newborns from families with a low baseline level of birthweight  
429 were susceptible to LFS-associated birthweight reduction, which was consistent with our  
430 finding of a strong and robust association between fire-sourced PM<sub>2.5</sub> and VLBW. This study  
431 adds to the epidemiological evidence on the adverse effects of LFS on birthweight. Relevant  
432 interventions regarding frequently occurring landscape fires, such as climate change  
433 mitigations, should be taken to protect maternal and infant health.

434

435 **References**

- 436 1. van der Werf GR, Randerson JT, Giglio L, et al. Global fire emissions and the  
437 contribution of deforestation, savanna, forest, agricultural, and peat fires (1997-2009).  
438 *Atmos Chem Phys* 2010; **10**(23): 11707-35.
- 439 2. Cascio WE. Wildland fire smoke and human health. *Sci Total Environ* 2018;  
440 **624**: 586-95.
- 441 3. Turetsky MR, Kane ES, Harden JW, et al. Recent acceleration of biomass  
442 burning and carbon losses in Alaskan forests and peatlands. *Nat Geosci* 2011; **4**(1):  
443 27-31.
- 444 4. Hantson S, Pueyo S, Chuvieco E. Global fire size distribution is driven by  
445 human impact and climate. *Global Ecol Biogeogr* 2015; **24**(1): 77-86.
- 446 5. Matz CJ, Egyed M, Xi GL, et al. Health impact analysis of PM2.5 from wildfire  
447 smoke in Canada (2013-2015,2017-2018). *Science of the Total Environment* 2020;  
448 **725**.
- 449 6. Barn PK, Elliott CT, Allen RW, Kosatsky T, Rideout K, Henderson SB.  
450 Portable air cleaners should be at the forefront of the public health response to  
451 landscape fire smoke. *Environ Health-Glob* 2016; **15**.
- 452 7. Johnston FH, Henderson SB, Chen Y, et al. Estimated global mortality  
453 attributable to smoke from landscape fires. *Environ Health Perspect* 2012; **120**(5):  
454 695-701.
- 455 8. Delfino RJ, Brummel S, Wu J, et al. The relationship of respiratory and  
456 cardiovascular hospital admissions to the southern California wildfires of 2003.

- 457 *Occup Environ Med* 2009; **66**(3): 189-97.
- 458 9. Morgan G, Sheppard V, Khalaj B, et al. Effects of bushfire smoke on daily  
459 mortality and hospital admissions in Sydney, Australia. *Epidemiology* 2010; **21**(1):  
460 47-55.
- 461 10. Kolarzyk E, Szot WM, Lyszczarz J. Lung function and breathing regulation  
462 parameters during pregnancy. *Arch Gynecol Obstet* 2005; **272**(1): 53-8.
- 463 11. Pedersen M, Giorgis-Allemand L, Bernard C, et al. Ambient air pollution and  
464 low birthweight: a European cohort study (ESCAPE). *Lancet Respir Med* 2013; **1**(9):  
465 695-704.
- 466 12. Padula AM, Yang W, Lurmann FW, Balmes J, Hammond SK, Shaw GM.  
467 Prenatal exposure to air pollution, maternal diabetes and preterm birth. *Environ Res*  
468 2019; **170**: 160-7.
- 469 13. Bijnens EM, Derom C, Gielen M, et al. Small for gestational age and  
470 exposure to particulate air pollution in the early-life environment of twins. *Environ Res*  
471 2016; **148**: 39-45.
- 472 14. Lee BE, Park HS, Kim YJ, Park EA, Hong YC, Ha EH. Air pollution exposure  
473 and health effects in fetus. *J Prev Med Public Health* 2004; **37**(4): 291-9.
- 474 15. Janssen BG, Byun HM, Gyselaers W, Lefebvre W, Baccarelli AA, Nawrot TS.  
475 Placental mitochondrial methylation and exposure to airborne particulate matter in  
476 the early life environment: An ENVIRONAGE birth cohort study. *Epigenetics* 2015;  
477 **10**(6): 536-44.
- 478 16. Samaras TT, Elrick H, Storms LH. Birthweight, rapid growth, cancer, and

- 479 longevity: a review. *J Natl Med Assoc* 2003; **95**(12): 1170-83.
- 480 17. Hviid A, Melbye M. The impact of birth weight on infectious disease  
481 hospitalization in childhood. *Am J Epidemiol* 2007; **165**(7): 756-61.
- 482 18. Blencowe H, Krasevec J, de Onis M, et al. National, regional, and worldwide  
483 estimates of low birthweight in 2015, with trends from 2000: a systematic analysis.  
484 *Lancet Glob Health* 2019; **7**(7): e849-e60.
- 485 19. Organization WH. Global targets 2025 to improve maternal, infant and young  
486 children nutrition. 2017. <https://www.who.int/nutrition/global-target-2025/en/>.
- 487 20. Malley CS, Kuylenstierna JC, Vallack HW, Henze DK, Blencowe H, Ashmore  
488 MRJEI. Preterm birth associated with maternal fine particulate matter exposure: a  
489 global, regional and national assessment. 2017; **101**: 173-82.
- 490 21. Li C, Yang M, Zhu Z, et al. Maternal exposure to air pollution and the risk of  
491 low birth weight: A meta-analysis of cohort studies. *Environ Res* 2020; **190**: 109970.
- 492 22. Li XY, Huang SQ, Jiao AQ, et al. Association between ambient fine  
493 particulate matter and preterm birth or term low birth weight: An updated systematic  
494 review and meta-analysis. *Environ Pollut* 2017; **227**: 596-605.
- 495 23. Holstius DM, Reid CE, Jesdale BM, Morello-Frosch R. Birth Weight following  
496 Pregnancy during the 2003 Southern California Wildfires. *Environ Health Persp* 2012;  
497 **120**(9): 1340-5.
- 498 24. Cândido da Silva AM, Moi GP, Mattos IE, Hacon Sde S. Low birth weight at  
499 term and the presence of fine particulate matter and carbon monoxide in the Brazilian  
500 Amazon: a population-based retrospective cohort study. *BMC pregnancy and*



501 *childbirth* 2014; **14**: 309.

502 25. Abdo M, Ward I, O'Dell K, et al. Impact of Wildfire Smoke on Adverse  
503 Pregnancy Outcomes in Colorado, 2007-2015. *Int J Environ Res Public Health* 2019;  
504 **16**(19).

505 26. O'Donnell MH, Behie AM. Effects of wildfire disaster exposure on male birth  
506 weight in an Australian population. *Evol Med Public Health* 2015; **2015**(1): 344-54.

507 27. Stowell JD, Geng G, Saikawa E, et al. Associations of wildfire smoke PM<sub>2.5</sub>  
508 exposure with cardiorespiratory events in Colorado 2011–2014. *Environment*  
509 *international* 2019; **133**: 105151.

510 28. Solazzo E, Bianconi R, Pirovano G, et al. Operational model evaluation for  
511 particulate matter in Europe and North America in the context of AQMEII. 2012; **53**:  
512 75-92.

513 29. Zhang H, Wang J, García LC, et al. Improving Surface PM<sub>2.5</sub> Forecasts in  
514 the United States Using an Ensemble of Chemical Transport Model Outputs: 1. Bias  
515 Correction With Surface Observations in Nonrural Areas. 2020; **125**(14):  
516 e2019JD032293.

517 30. Van Donkelaar A, Martin RV, Brauer M, et al. Global Estimates of Fine  
518 Particulate Matter Using a Combined Geophysical-Statistical Method with Information  
519 from Satellites, Models, and Monitors. *Environmental Science & Technology* 2016;  
520 **50**(7): 3762-72.

521 31. Xue T, Zhu T, Geng G, Zhang QJTLPH. Association between pregnancy loss  
522 and ambient PM<sub>2.5</sub> using survey data in Africa: a longitudinal case-control study,

- 523 1998–2016. 2019; **3**(5): e219-ee25.
- 524 32. Ha S, Mendola P. Are we ready to establish a causal relationship between air  
525 pollution and pregnancy loss? *The Lancet Planetary Health* 2019; **3**(5): e198-e9.
- 526 33. Curtis DJAohg. Use of siblings as controls in case-control association studies.  
527 1997; **61**(4): 319-33.
- 528 34. Xu RB, Yu P, Abramson MJ, et al. Wildfires, Global Climate Change, and  
529 Human Health. *New Engl J Med* 2020; **383**(22): 2173-81.
- 530 35. Salomon L, Bernard J, Ville YJUiO, Obstetrics GTOJotlSoUi, Gynecology.  
531 Estimation of fetal weight: reference range at 20 – 36 weeks' gestation and  
532 comparison with actual birth-weight reference range. 2007; **29**(5): 550-5.
- 533 36. Impacts on Newborns. <https://www.stateofglobalair.org/health/newborns>.
- 534 37. Fountoukis C, Nenes A. ISORROPIA II: a computationally efficient  
535 thermodynamic equilibrium model for K<sup>+</sup> Ca<sup>2+</sup> Mg<sup>2+</sup> NH<sub>4</sub><sup>+</sup> Na<sup>+</sup> SO<sub>4</sub><sup>2-</sup>  
536 NO<sub>3</sub><sup>-</sup> Cl<sup>-</sup> H<sub>2</sub>O aerosols. 2007.
- 537 38. Park RJ, Jacob DJ, Kumar N, Yantosca RM. Regional visibility statistics in the  
538 United States: Natural and transboundary pollution influences, and implications for  
539 the Regional Haze Rule. *Atmospheric Environment* 2006; **40**(28): 5405-23.
- 540 39. Fairlie TD, Jacob DJ, Park RJ. The impact of transpacific transport of mineral  
541 dust in the United States. *Atmospheric Environment* 2007; **41**(6): 1251-66.
- 542 40. Pye H, Liao H, Wu S, et al. Effect of changes in climate and emissions on  
543 future sulfate-nitrate-ammonium aerosol levels in the United States. *Journal of*  
544 *Geophysical Research: Atmospheres* 2009; **114**(D1).

545 41. Hoesly RM, Smith SJ, Feng L, et al. Historical (1750-2014) anthropogenic  
546 emissions of reactive gases and aerosols from the Community Emission Data  
547 System (CEDS). *Geoscientific Model Development* 2018; **11**: 369-408.

548
