# Supplementary material for: Exposure to landscape fire smoke extremely reduced birthweight in low- and middle-income countries
Source: medRxiv preprint, doi:10.1101/2021.04.27.21256225, version 1 (2021-04-30)
Supplement: Supplemental materials [file 256225_file03.docx]

**Supplemental materials**

***Supplemental text***

GEOS-Chem is a widely-utilized and well-designed global CTM to simulate the chemical components of atmosphere. This study used the 11-01 version of GEOS-Chem model. The meteorological fields to drive the CTM were directly obtained from an assimilated dataset, Modern-Era Retrospective analysis for Research and Applications Version 2 (MERRA-2), which is maintained by the Global Modeling and Assimilation Office of National Aeronautics and Space Administration (NASA), United States (US). MERRA-2 has a spatial resolution of 0.5° × 0.625°, and is freely distributed by the Goddard Earth Sciences Data and Information Services Center of US NASA (https://disc.gsfc.nasa.gov/).

For the chemical reactions, our GEOS-Chem model applied the full Ox−NOx−CO−VOC−HOx mechanism. The model simulated the reactions relevant to multiple atmospheric components, such as sulfate-nitrate-ammonium, primary and secondary carbonaceous aerosols, mineral dusts and sea-salts. For instance, we simulated the interactions of sulfate-nitrate-ammonium, according to the ISOROPIA-II thermo-dynamical equilibrium37. Since this study was focused on PM2.5 simulations, we evaluated the aerosol results extensively using measurement data 38-40. In the model, anthropogenic emissions, from 2000 to 2014, were obtained from the global inventory of Community Emissions Data System (CEDS) 41, the fire emissions during the same period, were collected from the Global Fire Emission Database (GFED4s). We ran the GEOS-Chem simulations with a six-month spin-up starting from July 1999, with a horizonal resolution of 2° × 2.5°, and a vertical resolution of 47 layers. We took the PM2.5 in the bottom layer as the ground-surface concentrations of PM2.5.

Figure S 1 The estimated associations between fire-sourced PM2.5 and birthweight change, low birthweight or very low birthweight, by different lags. The nth lagged exposure is defined as the concentration of fire-sourced PM2.5 during the nth month before birth. The results are estimated from the lag-distributed models.

Figure S 2 The cumulated birthweight change associated with an average of fire-sourced PM2.5 concentrations from a lagged month to birth.

Figure S 3 The subpopulation-specific associations between gestational exposure to fire-sourced PM2.5 and birthweight change, low birthweight and very low birthweight.

Figure S 4 The baseline-varying association between gestational exposure to fire-sourced PM2.5 and absolute birthweight change. The solid line presents the point-estimates, the dashed line presents the 95% confidence intervals, and the boxplots present the distributions of different birthweight levels by regions.

Table S1 Population characteristics.

| Variable | Group | All samples | low-birthweight births | very-low-birthweight births |
| --- | --- | --- | --- | --- |
| Categorical variable | | N (percentage, %) | | |
| Total | | 227,948 (100) | 31,854 (100) | 2,912 (100) |
| Sex | Male | 114,772 (50.4) | 14,840 (46.6) | 1,379 (47.4) |
| Female | 113,176 (49.6) | 17,014 (53.4) | 1,533 (52.6) |
| Year of birth | 2000 | 1,169 (0.5) | 166 (0.5) | 15 (0.5) |
| 2001 | 4,366 (1.9) | 645 (2.0) | 64 (2.2) |
| 2002 | 5,837 (2.6) | 777 (2.4) | 90 (3.1) |
| 2003 | 7,853 (3.4) | 959 (3.0) | 97 (3.3) |
| 2004 | 9,729 (4.3) | 1,055 (3.3) | 114 (3.9) |
| 2005 | 10,091 (4.4) | 1,136 (3.6) | 113 (3.9) |
| 2006 | 13,222 (5.8) | 1,514 (4.8) | 120 (4.1) |
| 2007 | 13,806 (6.1) | 1,697 (5.3) | 164 (5.6) |
| 2008 | 15,324 (6.7) | 1,903 (6.0) | 153 (5.3) |
| 2009 | 18,004 (7.9) | 2,034 (6.4) | 183 (6.3) |
| 2010 | 25,159 (11.0) | 3,305 (10.4) | 295 (10.1) |
| 2011 | 29,397 (12.9) | 4,537 (14.2) | 391 (13.4) |
| 2012 | 27,284 (12.0) | 4,352 (13.7) | 397 (13.6) |
| 2013 | 23,015 (10.1) | 3,920 (12.3) | 388 (13.3) |
| 2014 | 23,692 (10.4) | 3,854 (12.1) | 328 (11.3) |
| Singleton (n = 1) or multiple births (n > 1) | n = 1 | 211,276 (92.7) | 23,910 (75.1) | 1,740 (59.8) |
| n = 2 | 8,268 (3.6) | 3,876 (12.2) | 552 (19.0) |
| n = 3 | 8,276 (3.6) | 3,962 (12.4) | 573 (19.7) |
| n = 4 | 124 (0.1) | 102 (0.3) | 45 (1.5) |
| n = 5 | 4 (0.0) | 4 (0.0) | 2 (0.1) |
| Region | East Asia & Pacific | 10,059 (4.4) | 1,259 (4.0) | 173 (5.9) |
| Latin America & Caribbean | 25,747 (11.3) | 3,040 (9.5) | 372 (12.8) |
| North Africa, Europe & Central Asia | 21,932 (9.6) | 2,948 (9.3) | 404 (13.9) |
| South Asia | 57,004 (25.0) | 11,307 (35.5) | 981 (33.7) |
| Sub-Saharan Africa | 113,206 (49.7) | 13,300 (41.8) | 982 (33.7) |
| Recall period (years, from birthdate to survey date) | < 0.5 | 22,628 (9.9) | 2,586 (8.1) | 218 (7.5) |
| 0.5~1.5 | 40,984 (18.0) | 5,421 (17.0) | 496 (17.0) |
| 1.5~2.5 | 48,707 (21.4) | 7,258 (22.8) | 674 (23.1) |
| 2.5~3.5 | 40,755 (17.9) | 6,086 (19.1) | 600 (20.6) |
| 3.5~4.5 | 52,658 (23.1) | 7,442 (23.4) | 647 (22.2) |
| 4.5~5 | 22,216 (9.7) | 3,061 (9.6) | 277 (9.5) |
| Birth order | 1 | 47,969 (21.0) | 7,737 (24.3) | 767 (26.3) |
| 2 | 70,468 (30.9) | 9,765 (30.7) | 864 (29.7) |
| 3 | 41,015 (18.0) | 5,467 (17.2) | 477 (16.4) |
| 4 | 25,521 (11.2) | 3,324 (10.4) | 302 (10.4) |
| 5 | 16,517 (7.2) | 2,103 (6.6) | 190 (6.5) |
| 6 | 10,813 (4.7) | 1,406 (4.4) | 132 (4.5) |
| 7 | 15,645 (6.9) | 2,052 (6.4) | 180 (6.2) |
| Maternal age | < 16 | 1,712 (0.8) | 315 (1.0) | 41 (1.4) |
| 16~20 | 43,166 (18.9) | 6,895 (21.6) | 650 (22.3) |
| 21~25 | 82,870 (36.4) | 11,666 (36.6) | 1,056 (36.3) |
| 26~30 | 56,738 (24.9) | 7,317 (23.0) | 628 (21.6) |
| 31~35 | 28,694 (12.6) | 3,591 (11.3) | 345 (11.8) |
| 36~40 | 12,210 (5.4) | 1,706 (5.4) | 163 (5.6) |
| > 40 | 2,558 (1.1) | 364 (1.1) | 29 (1.0) |
| Residence | Rural | 142,202 (62.4) | 20,396 (64.0) | 1,740 (59.8) |
| Urban | 85,746 (37.6) | 11,458 (36.0) | 1,172 (40.2) |
| Education | No education | 52,061 (22.8) | 8,436 (26.5) | 691 (23.7) |
| Primary | 74,510 (32.7) | 9,476 (29.7) | 855 (29.4) |
| Secondary | 82,914 (36.4) | 11,600 (36.4) | 1,110 (38.1) |
| Higher | 18,455 (8.1) | 2,340 (7.3) | 256 (8.8) |
| Unknown | 8 (0.0) | 2 (0.0) | 0 |
| Head of household | Female | 37,259 (16.3) | 5,309 (16.7) | 499 (17.1) |
| Male | 190,689 (83.7) | 26,545 (83.3) | 2,413 (82.9) |
| Wealth level | Richest | 41,464 (18.2) | 4,948 (15.5) | 471 (16.2) |
| Richer | 45,145 (19.8) | 6,091 (19.1) | 567 (19.5) |
| Middle | 47,235 (20.7) | 6,567 (20.6) | 591 (20.3) |
| Poorer | 47,539 (20.9) | 6,920 (21.7) | 609 (20.9) |
| Poorest | 46,231 (20.3) | 7,224 (22.7) | 661 (22.7) |
| Unknown | 334 (0.1) | 104 (0.3) | 13 (0.4) |
| Type of cooking energy | Unclean | 160,760 (70.5) | 21,897 (68.7) | 1,780 (61.1) |
| Clean | 53,348 (23.4) | 7,713 (24.2) | 869 (29.8) |
| Unknown | 13,840 (6.1) | 2,244 (7.0) | 263 (9.0) |
| Body mass index level | Underweight | 20,756 (9.1) | 4,154 (13.0) | 327 (11.2) |
| Normal | 97,169 (42.6) | 13,863 (43.5) | 1,164 (40.0) |
| Overweight | 32,759 (14.4) | 4,006 (12.6) | 397 (13.6) |
| Obese | 14,265 (6.3) | 1,776 (5.6) | 224 (7.7) |
| Unknown | 62,999 (27.6) | 8,055 (25.3) | 800 (27.5) |
| Smoking | No | 206,937 (90.8) | 28,629 (89.9) | 2,599 (89.3) |
| Yes | 9,105 (4.0) | 1,470 (4.6) | 132 (4.5) |
| Unknown | 11,906 (5.2) | 1,755 (5.5) | 181 (6.2) |
| Unemployed mother | No | 102,861 (45.1) | 11,874 (37.3) | 1,056 (36.3) |
| Yes | 76,781 (33.7) | 10,501 (33.0) | 1,067 (36.6) |
| Unknown | 48,306 (21.2) | 9,479 (29.8) | 789 (27.1) |
| Continuous variable | | Mean (standard deviation) | | |
| Birthweight (g) | | 3081.91 (724.11) | 1962.22 (368.99) | 1092.79 (222.60) |
| Fire-sourced PM2.5 (µg/m3) | | 4.29 (5.53) | 3.35 (4.65) | 2.64 (3.86) |
| Non-fire-sourced PM2.5 (µg/m3) | | 37.43 (29.60) | 42.03 (31.90) | 40.99 (32.61) |
| Temperature (K) | | 296.38 (4.78) | 296.90 (4.37) | 296.78 (4.26) |
| Humidity (g/kg) | | 12.36 (3.51) | 12.18 (3.40) | 12.00 (3.56) |
| Maternal age (year) | | 25.52 (5.71) | 25.13 (5.79) | 25.05 (5.89) |
| Number of matched siblings | | 2.13 (0.36) | 2.18 (0.43) | 2.26 (0.53) |
